# Supplementary material
Source: publisher figshare collection journal article supplement (https://acs.figshare.com/ndownloader/files/3883102)
Supplement: Supplementary file 1 [file 3883102]

## Supporting information

# Integrin $\alpha_v\beta_3$ -Targeted Magnetic Nanohybrids with Enhanced Antitumor Efficacy, Cell Cycle Arrest Ability and Encouraging Anti-Cell-Migration Activity

Guo-Bin Ding<sup>†,‡</sup>, Yan Wang<sup>†</sup>, Yi Guo<sup>\*,†</sup>, Li Xu<sup>\*,†,§</sup>

<sup>†</sup>Key laboratory for Molecular Enzymology and Engineering, the Ministry of Education, College of Life Science, Jilin University, Changchun 130012, People's Republic of China

<sup>‡</sup>Institute of Biotechnology, the Key Laboratory of Chemical Biology and Molecular Engineering of Ministry of Education, Shanxi University, Taiyuan 030006, People's Republic of China

<sup>§</sup>National Engineering Laboratory for AIDS Vaccine, Jilin University, Changchun 130012, People's Republic of China

**Corresponding Author** Tel.: +86-431-85155226; Fax: +86-431-85155226. E-mail:

xuli@jlu.edu.cn; guoyi@jlu.edu.cn.

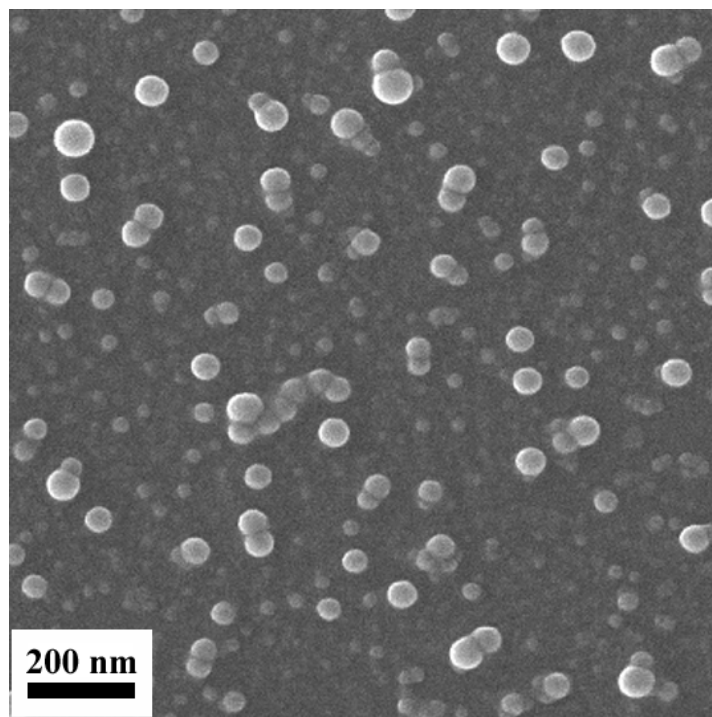

**Figure S1.** SEM image of RFHEMNs obtained using an XL-30 ESEM FEG Scanning Electron Microscope (FEI COMPANY).
